# Supplementary material for: CD95 maintains stem cell-like and non-classical EMT programs in primary human glioblastoma cells
Source: PubMed Central journal article supplement (PMC4855647; doi:10.1038/cddis.2016.102), 2016-04-28

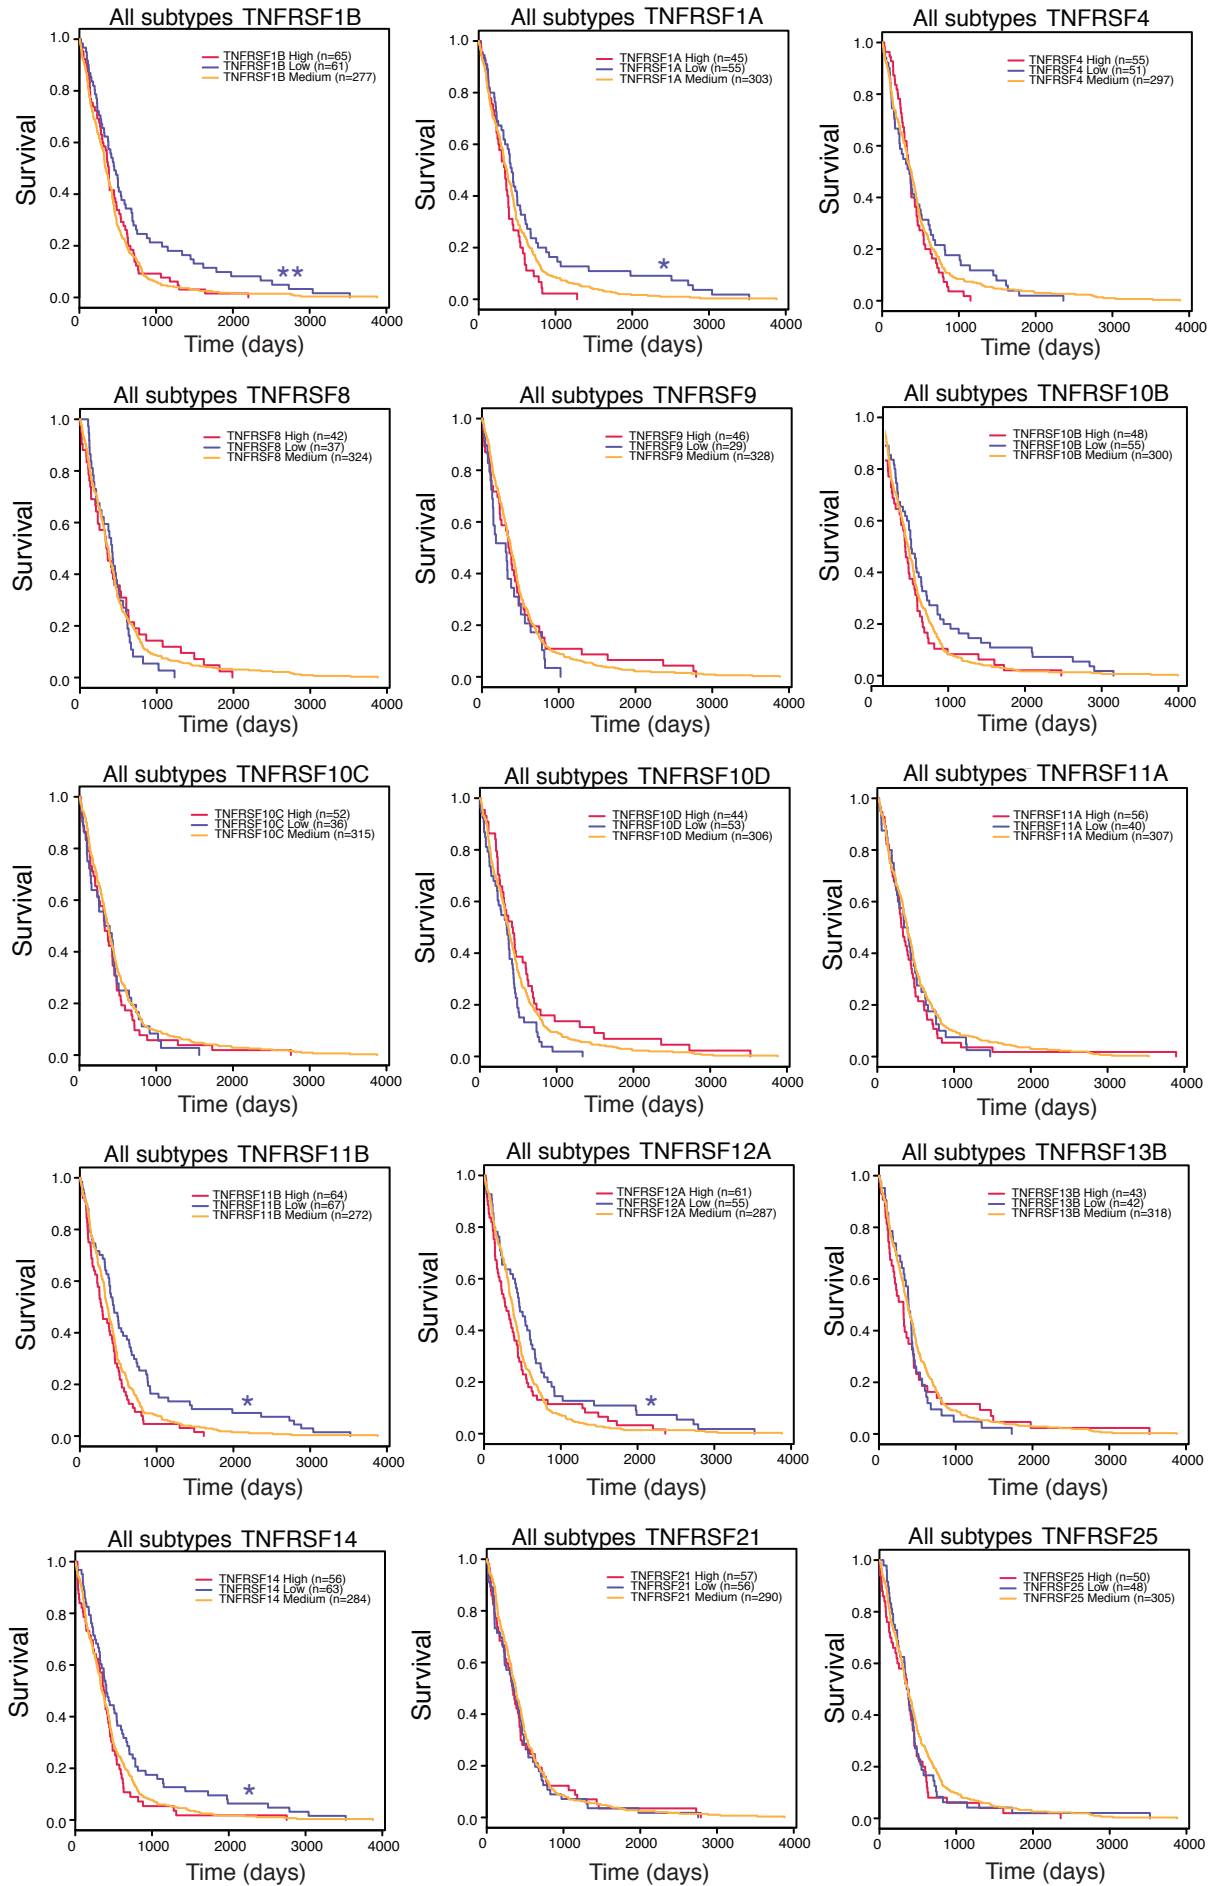

Supplement: cddis2016102x2.pdf [file cddis2016102x2.pdf]
